# Supplementary material for: Interhemispheric Facilitatory Effect of High-Frequency rTMS: Perspective from Intracortical Facilitation and Inhibition
Source: MDPI journal article supplement (doi:10.3390/brainsci12080970), 2022-07-23
Supplement: s1 [file s1]

| Condition | Parameter                | Day1          | Day2          | Day3          | F <sub>2,57</sub> | p     |
|-----------|--------------------------|---------------|---------------|---------------|-------------------|-------|
| Rest      | MEP <sub>sp</sub> / mV   | 0.677(0.44)   | 0.653(0.43)   | 0.589(0.36)   | 0.244             | 0.784 |
|           | MEP <sub>SICF</sub> / mV | 0.993(0.49)   | 0.774(0.46)   | 0.885(0.53)   | 0.972             | 0.384 |
|           | MEP <sub>LICF</sub> / mV | 0.949(0.53)   | 0.753(0.48)   | 0.861(0.51)   | 0.787             | 0.460 |
| V.M.      | MEP <sub>sp</sub> / mV   | 1.917(1.09)   | 2.098(1.16)   | 1.998(1.15)   | 0.129             | 0.879 |
|           | MEP <sub>SICF</sub> / mV | 1.995(0.95)   | 2.251(1.24)   | 2.063(1.21)   | 0.272             | 0.763 |
|           | MEP <sub>LICF</sub> / mV | 2.208(1.17)   | 2.500(1.61)   | 2.337(1.34)   | 0.224             | 0.800 |
| CSP       | CSP <sub>sp</sub> / ms   | 154.95(25.34) | 160.8(32.69)  | 156.85(35.30) | 0.181             | 0.835 |
|           | CSP <sub>SICF</sub> / ms | 194.70(33.26) | 189.50(29.89) | 193.80(34.37) | 0.146             | 0.865 |
|           | CSP <sub>LICF</sub> / ms | 169.00(27.52) | 158.15(31.41) | 169.25(34.50) | 0.821             | 0.445 |

**Supplementary Table 1. Mean (SD) of the 3-day baseline MEP amplitude and CSP duration.** V.M. = voluntary movement; MEP = motor evoked potential; SICF = short interval intracortical facilitation; LICF = long interval intracortical facilitation; CSP = cortical silent period; sp = single pulse.

| Condition | Parameter                | Baseline      | During        | Post          | Later         | F <sub>3,57</sub> | p     |
|-----------|--------------------------|---------------|---------------|---------------|---------------|-------------------|-------|
| Rest      | MEP <sub>sp</sub> / mV   | 0.558(0.31)   | 0.665(0.64)   | 0.641(0.56)   | 0.553(0.34)   | 0.678             | 0.569 |
|           | MEP <sub>SICF</sub> / mV | 0.877(0.39)   | 0.808(0.37)   | 0.820(0.41)   | 0.738(0.32)   | 0.978             | 0.410 |
|           | MEP <sub>LICF</sub> / mV | 0.833(0.35)   | 0.857(0.54)   | 0.849(0.42)   | 0.779(0.32)   | 0.135             | 0.939 |
| V.M.      | MEP <sub>sp</sub> / mV   | 1.559(0.62)   | 1.725(0.71)   | 1.706(0.76)   | 1.614(0.70)   | 1.025             | 0.388 |
|           | MEP <sub>SICF</sub> / mV | 1.758(0.84)   | 1.821(0.79)   | 1.907(0.75)   | 1.806(0.73)   | 0.785             | 0.507 |
|           | MEP <sub>LICF</sub> / mV | 2.003(1.02)   | 2.095(0.85)   | 2.164(1.15)   | 2.042(0.78)   | 0.632             | 0.597 |
| CSP       | CSP <sub>sp</sub> / ms   | 160.50(42.50) | 165.80(27.32) | 172.90(34.35) | 168.85(38.22) | 1.232             | 0.307 |
|           | CSP <sub>SICF</sub> / ms | 192.70(30.50) | 197.70(38.98) | 208.85(32.10) | 198.60(37.10) | 1.917             | 0.137 |
|           | CSP <sub>LICF</sub> / ms | 182.60(26.97) | 178.10(37.87) | 188.95(34.28) | 182.80(33.69) | 0.410             | 0.746 |

**Supplementary Table 2. Mean (SD) of the chronological modulation of MEP amplitude and CSP duration (sham-rTMS group).** V.M. = voluntary movement; MEP = motor evoked potential; SICF = short interval intracortical facilitation; LICF = long interval intracortical facilitation; CSP = cortical silent period; sp = single pulse.
